# Supplementary material
Source: publisher figshare collection journal article supplement (https://aacr.figshare.com/ndownloader/files/39860696)
Supplement: Supplementary file 1 [file 39860696]

## Sheet: Table S4
Table S4. The protein expression that was analyzed by a RPPA assay
	CCNB1	FOXM1	ACACA	PXN	CHEK1	RB1	RPS6	CCNE1	MSH6	PMS2	EIF4G1	CDC2	YWHAZ	MAPK1	FASN	ACACA ACACB	EIF4EBP1	RPS6KB1	RPS6KB1	PRKAA1	EEF2K	MSH2	PRKAA1	MAPK1 MAPK3	IRS1	ANXA1	FRAP1	GAB2	TP53	EIF4EBP1	GYS	EIF4EBP1	PDK1	ANXA7	MYH9	RPS6KA1	PEA15	MAPK9	RAF1	BAP1	RPS6	MAP2K1	BAX	TSC2	ARAF	BIRC2	PTK2	AKT1 AKT2 AKT3	UBAC1
MDA-MB-231	Cyclin_B1-R-V_GBL1032816	FoxM1-R-V_GBL1033134	ACC1-R-E_GBL1032798	Paxillin-R-C_GBL1032841	Chk1-M-C_GBL1033212	Rb_pS807_S811-R-V_GBL1032847	S6_pS235_S236-R-V_GBL1033064	Cyclin_E1-M-V_GBL1033181	MSH6-R-C_GBL1033119	PMS2-R-V_GBL1033164	eIF4G-R-C_GBL1033135	CDK1-R-V_GBL1033109	14-3-3_zeta-R-V_GBL1033094	p38-R-V_GBL1032836	FASN-R-V_GBL1033148	ACC_pS79-R-V_GBL1032797	4E-BP1_pS65-R-V_GBL1032795	p70S6K-R-V_GBL1032839	p70S6K_pT389-R-V_GBL1032840	AMPK_pT172-R-V_GBL1032800	eEF2K-R-V_GBL1033118	MSH2-M-V_GBL1033194	AMPK_alpha-R-C_GBL1032799	MAPK_pT202_Y204-R-V_GBL1032829	IRS1-R-V_GBL1033086	Annexin_I-M-V_GBL1033215	mTOR-R-V_GBL1032831	Gab2-R-V_GBL1033107	p53-R-C_GBL1032838	4E-BP1_pT37_T46-R-V_GBL1032796	GYS-R-V_GBL1033113	4E-BP1-R-V_GBL1032794	PDK1_pS241-R-V_GBL1032843	Annexin_VII-M-V_GBL1033208	Myosin IIa pS1943-R-V_GBL1033149	p90RSK-R-C_GBL1033080	PEA15-R-V_GBL1033110	JNK2-R-C_GBL1032827	C-Raf-R-V_GBL1033153	BAP1-M-V_GBL1033214	S6_pS240_S244-R-V_GBL1033065	MEK1-R-V_GBL1032830	Bax-R-V_GBL1032803	Tuberin-R-V_GBL1033241	A-Raf-R-V_GBL1033155	cIAP-R-C_GBL1033104	FAK_pY397-R-V_GBL1033160	Akt-R-V_GBL1033245	UBAC1-R-V_GBL1033169
Ctrl	2.53408	1.05798	4.5018	1.64636	1.02626	3.10949	1.79508	1.06811	1.52479	0.625414	1.57103	1.67591	1.39195	2.23248	0.34003	0.514688	1.80647	0.402848	0.709452	0.912594	0.675057	1.20268	1.50046	1.24974	1.22523	0.479123	1.35371	1.15025	0.545533	2.25974	0.842642	1.14353	1.21273	0.790811	0.582841	0.647112	1.41805	0.846244	1.86129	0.765438	0.676519	1.30257	0.875156	2.29891	0.534873	1.98253	0.05105	0.847679	0.288881
Ctrl	2.67541	1.02532	4.37047	1.55124	1.03236	3.22559	1.76823	1.07562	1.51904	0.632751	1.52583	1.8518	1.42067	2.19988	0.357654	0.494569	1.8257	0.402515	0.719223	0.902699	0.658651	1.15743	1.68218	1.1917	1.19788	0.477128	1.35405	1.15126	0.538365	2.29719	0.952814	1.12568	1.23648	0.78795	0.609669	0.653367	1.463	0.803367	1.88781	0.784407	0.677345	1.3396	0.825576	2.28863	0.550834	1.96759	0.0531872	0.966752	0.256128
Ctrl	2.8786	1.04194	4.37006	1.69845	0.99672	3.27359	1.85288	1.04045	1.54195	0.60336	1.54156	1.83209	1.36118	2.19245	0.346954	0.497806	1.86659	0.412541	0.679098	0.945269	0.635295	1.175	1.71663	1.26025	1.26863	0.472728	1.385	1.18006	0.54937	2.33944	0.904145	1.19538	1.30501	0.748004	0.579195	0.614927	1.50121	0.801018	1.92384	0.753624	0.692594	1.37965	0.833461	2.28864	0.536672	2.04263	0.0481056	0.971394	0.25723
shRNA	0.975666	0.458776	1.94558	0.78106	0.554976	1.73429	1.04315	0.5977	0.934899	0.384795	0.944415	1.1164	0.883945	1.38092	0.222467	0.314352	1.14175	0.266217	0.456898	0.583073	0.437774	0.77372	1.07614	0.797936	0.819834	0.326446	0.938151	0.824153	0.386681	1.65527	0.662822	0.803419	0.881942	0.579188	0.444182	0.470566	1.0861	0.602294	1.41479	0.602985	0.528551	0.970478	0.60758	1.73926	0.416647	1.50035	0.0439052	0.71461	0.214421
shRNA	1.04155	0.455155	2.23926	0.812431	0.497933	1.92986	1.04228	0.603677	0.910674	0.340074	0.948308	1.05804	0.874106	1.40219	0.215141	0.337274	1.22197	0.254341	0.436312	0.622471	0.423385	0.773185	1.13817	0.840307	0.851247	0.324694	0.951069	0.760113	0.37241	1.70069	0.619628	0.863318	0.92464	0.52668	0.408832	0.478619	1.08292	0.605958	1.40474	0.554443	0.5032	1.04068	0.661095	1.75964	0.396567	1.55285	0.0363639	0.731818	0.212933
shRNA	0.995119	0.447963	1.99132	0.787274	0.498731	1.76185	0.995754	0.626926	0.898293	0.391048	0.932983	1.11515	0.81545	1.34172	0.223166	0.304631	1.13289	0.256367	0.454257	0.572582	0.419205	0.767785	1.0653	0.841097	0.816502	0.327151	0.932497	0.822491	0.377121	1.51957	0.627439	0.793625	0.864366	0.563701	0.41838	0.440487	1.03815	0.599967	1.37997	0.5567	0.493039	0.991524	0.63194	1.68616	0.422277	1.53731	0.0369863	0.717703	0.196964
Fold Change	2.68498	2.29477	2.1441	2.0565	1.96911	1.77086	1.75783	1.74161	1.67128	1.66816	1.64151	1.62932	1.62184	1.60608	1.58093	1.576	1.5726	1.5676	1.56425	1.55251	1.53785	1.52725	1.49386	1.49302	1.48406	1.46069	1.45045	1.44659	1.43747	1.41449	1.41349	1.40816	1.40558	1.39363	1.39351	1.37831	1.36639	1.35527	1.35086	1.34381	1.34212	1.33941	1.33335	1.32615	1.31314	1.30546	1.29924	1.28727	1.28498
P value	7.7017e-05	4.9191e-07	2.02119e-05	4.52979e-05	2.14185e-05	5.80242e-05	1.22276e-05	5.36924e-06	1.11744e-06	0.000170906	1.73445e-06	0.000303015	4.12036e-05	2.67676e-06	2.38564e-05	9.03805e-05	3.7112e-05	7.50926e-06	5.02874e-05	7.98559e-05	5.74358e-05	6.81471e-06	0.00158763	9.1697e-05	6.75765e-05	1.97931e-07	3.51899e-06	0.000103144	6.21193e-06	0.000337484	0.00159052	0.000376351	0.000393867	0.00046153	0.000307002	0.000458383	0.000164312	0.000132748	1.93262e-05	0.000416254	0.000122672	0.000368002	0.000637072	1.42027e-05	0.000156318	7.24763e-05	0.0144655	0.00710419	0.00804808
	CCNB1	NDRG1	PMS2	FOXM1	CCNE1	PDCD4	AKT1 AKT2 AKT3	PXN	AKT1 AKT2 AKT3	ACACA	PYGM	CAV1	YWHAZ	PARP1	AKT1S1	PDK1	PAI1	EIF4G1	WWTR1	PDGFR	MAPK1	GYS	MSH6	MDM2	BAX	PRKAA1	YAP1	YAP1	PEA15	CRM1	CHEK1	IRS1	ATM	SMAD3	TSC2	MSH2	ERBB3	PDK1	KDR	EIF4EBP1	BAP1	EEF2	EIF4EBP1	PEA15	SNAI2	CDC2	EIF4E	GYS	ERRFI1
1205 Lu	Cyclin_B1-R-V_GBL1032816	NDRG1_pT346-R-V_GBL1033246	PMS2-R-V_GBL1033164	FoxM1-R-V_GBL1033134	Cyclin_E1-M-V_GBL1033181	PDCD4-R-C_GBL1033088	Akt_pS473-R-V_GBL1032820	Paxillin-R-C_GBL1032841	Akt_pT308-R-V_GBL1033147	ACC1-R-E_GBL1032798	GPBB-R-V_GBL1033165	Caveolin-1-R-V_GBL1033240	14-3-3_zeta-R-V_GBL1033094	PARP1-R-V_GBL1033250	PRAS40_pT246-R-V_GBL1033078	PDK1_pS241-R-V_GBL1032843	PAl-1-M-V_GBL1033184	eIF4G-R-C_GBL1033135	TAZ-R-V_GBL1033082	PDGFR_beta-R-V_GBL1033159	p38-R-V_GBL1032836	GYS-R-V_GBL1033113	MSH6-R-C_GBL1033119	MDM2_pS166-R-V_GBL1033150	Bax-R-V_GBL1032803	AMPK_alpha-R-C_GBL1032799	YAP_pS127-R-E_GBL1033243	YAP-R-E_GBL1033083	PEA15-R-V_GBL1033110	CRM1-R-E_GBL1033238	Chk1-M-C_GBL1033212	IRS1-R-V_GBL1033086	ATM-R-V_GBL1033172	Smad3-R-V_GBL1033085	Tuberin-R-V_GBL1033241	MSH2-M-V_GBL1033194	HER3_pY1289-R-C_GBL1033077	PDK1-R-V_GBL1032842	VEGFR2-R-V_GBL1033072	4E-BP1_pT37_T46-R-V_GBL1032796	BAP1-M-V_GBL1033214	eEF2-R-C_GBL1033117	4E-BP1_pS65-R-V_GBL1032795	PEA15_pS116-R-V_GBL1033111	Snail-M-QC_GBL1033190	CDK1-R-V_GBL1033109	eIF4E-R-V_GBL1033075	GYS_pS641-R-V_GBL1033114	MIG-6-M-V_GBL1033203
Ctrl	0.895396	2.21461	0.882774	0.641857	1.15479	1.99998	1.21816	1.32041	0.746171	1.26437	0.31784	4.08347	1.66526	2.09771	1.01675	1.54247	7.67091	1.31494	1.68904	0.441443	0.871608	1.50715	1.03207	1.3017	0.979171	1.27826	1.46836	1.44512	1.05949	1.29654	0.537582	0.887228	0.0582532	1.41582	2.0592	0.820091	0.698637	1.01312	1.48185	1.25448	0.441208	0.863404	1.29979	2.76298	0.848588	0.912684	0.754375	0.580295	1.24395
Ctrl	0.875238	2.37543	0.938992	0.637046	1.1521	2.18884	1.31525	1.3547	0.855819	1.20153	0.359973	4.22493	1.87207	2.23262	1.01021	1.57	8.38785	1.38403	1.71933	0.431675	0.899354	1.62032	1.08244	1.31509	1.01391	1.33881	1.59259	1.92512	1.12915	1.51339	0.57976	0.883358	0.0580459	1.43285	2.18168	0.841067	0.691123	1.04444	1.63403	1.34356	0.429184	0.88993	1.36896	2.7812	0.894955	0.996213	0.729516	0.623663	1.22497
Ctrl	1.0793	2.74799	1.03839	0.693023	1.27028	2.45359	1.47591	1.62028	0.886727	1.57907	0.45391	5.05721	2.14439	2.65624	1.10125	1.76538	9.86057	1.57066	1.84321	0.395434	1.12219	1.94581	1.21046	1.3374	1.15195	1.81143	1.90627	2.88076	1.31136	1.62559	0.623708	0.97256	0.0630041	1.51111	2.80958	0.865297	0.702133	1.12674	2.06133	1.57742	0.424034	1.05054	1.54712	2.86206	0.943438	1.12861	0.857546	0.71289	1.31773
shRNA	0.368369	0.9337	0.429004	0.330435	0.566127	1.27594	0.706004	0.774864	0.49204	0.736203	0.218036	2.68576	1.213	1.39167	0.686478	1.08855	5.82068	0.935967	1.21497	0.30641	0.694742	1.25323	0.803476	0.995267	0.770003	1.02374	1.22241	1.6785	0.865102	1.1389	0.484177	0.69833	0.0379845	1.11822	1.73484	0.674807	0.61482	0.854531	1.54772	1.1603	0.381479	0.776782	1.11177	2.28273	0.73114	0.816244	0.675331	0.543148	1.07849
shRNA	0.372227	0.958162	0.342479	0.269894	0.565682	1.11895	0.734087	0.775127	0.464102	0.844832	0.211021	2.95205	1.12175	1.51454	0.668897	1.07958	6.11234	1.0269	1.22279	0.272167	0.653432	1.1919	0.764429	0.888724	0.741905	1.16005	1.2155	1.49461	0.88536	1.08816	0.419749	0.731809	0.0455895	1.18484	2.01187	0.660968	0.659773	0.844384	1.32555	1.08982	0.300143	0.754581	1.20779	2.663	0.71382	0.840384	0.615636	0.526308	1.02997
shRNA	0.375844	1.00451	0.448427	0.325327	0.602579	1.1404	0.702803	0.812945	0.47802	0.779717	0.23695	2.49711	1.17355	1.43276	0.674153	1.00681	5.97818	0.991934	1.25385	0.3169	0.697298	1.14862	0.792373	0.951222	0.757667	1.0733	1.22408	1.53971	0.902196	1.14839	0.442024	0.700788	0.0561266	1.11792	1.79626	0.682396	0.399991	0.859245	1.29419	1.12981	0.36826	0.749319	1.12126	1.99012	0.774918	0.854293	0.656383	0.528813	1.10476
Fold Change	2.5527	2.53352	2.34457	2.1303	2.0625	1.87889	1.87098	1.81781	1.73531	1.71342	1.69927	1.64299	1.61951	1.61019	1.54135	1.53636	1.4471	1.44498	1.42257	1.41662	1.41442	1.4117	1.40872	1.39467	1.38574	1.35965	1.35643	1.32638	1.31943	1.31405	1.29355	1.2873	1.28348	1.27442	1.27197	1.25185	1.2492	1.24476	1.24229	1.23537	1.23292	1.2294	1.22525	1.212	1.21042	1.20972	1.20237	1.19933	1.17846
P value	0.000882636	0.000746091	0.000614427	0.000189508	0.000113712	0.00180162	0.00120144	0.00252824	0.0012631	0.00973136	0.0192633	0.00623516	0.00684081	0.00684673	0.000251032	0.00161623	0.0147728	0.00561046	0.000433411	0.00307197	0.0247409	0.0216787	0.00408761	0.000333633	0.00544818	0.0871945	0.0288767	0.294677	0.0204086	0.0229201	0.0135043	0.00277027	0.0744678	0.00105183	0.111791	0.00030584	0.157958	0.00363445	0.152706	0.0544369	0.0338323	0.0418566	0.0316928	0.0677744	0.00905711	0.0513968	0.0377679	0.0542967	0.00591833
	CCNB1	CCNE1	CAV1	ACACA	FOXM1	PMS2	SRC	PARP1	STAT3	CTNNB1	CDH2	SRC	IGFBP2	CRM1	RBM15	MSH2	MCL1	CDKN1A	MSH6	BAP1	PDCD4	ERBB3	CMC2	EIF4EBP1	STAT5A	YWHAZ	BCL2	EEF2K	PRKAA1	EIF4E	BAX	CHEK2	PPIF	RAF1	CHEK1	CDC2	PYGM	PXN	BIRC2	CHEK1	EIF4G1	SMAD3	SRC	KAT2A	EGFR	IRS1	GYS	GYS	FRAP1
WM9	Cyclin_B1-R-V_GBL1032816	Cyclin_E1-M-V_GBL1033181	Caveolin-1-R-V_GBL1033240	ACC1-R-E_GBL1032798	FoxM1-R-V_GBL1033134	PMS2-R-V_GBL1033164	Src_pY527-R-V_GBL1033067	PARP1-R-V_GBL1033250	STAT3_pY705-R-V_GBL1033068	beta-Catenin-R-V_GBL1032804	N-Cadherin-R-V_GBL1032833	Src-M-V_GBL1033191	IGFBP2-R-V_GBL1032826	CRM1-R-E_GBL1033238	RBM15-R-V_GBL1033142	MSH2-M-V_GBL1033194	Mcl-1-R-V_GBL1033158	p21-R-V_GBL1032835	MSH6-R-C_GBL1033119	BAP1-M-V_GBL1033214	PDCD4-R-C_GBL1033088	HER3-R-V_GBL1033102	Cox 2-R-C_GBL1033156	4E-BP1_pS65-R-V_GBL1032795	STAT5-alpha-R-V_GBL1033069	14-3-3_zeta-R-V_GBL1033094	Bcl-2-M-V_GBL1033177	eEF2K-R-V_GBL1033118	AMPK_alpha-R-C_GBL1032799	eIF4E-R-V_GBL1033075	Bax-R-V_GBL1032803	Chk2_pT68-R-C_GBL1032811	Cyclophilin_F-M-V_GBL1033253	C-Raf_pS338-R-V_GBL1032815	Chk1_pS345-R-C_GBL1033100	CDK1-R-V_GBL1033109	GPBB-R-V_GBL1033165	Paxillin-R-C_GBL1032841	cIAP-R-C_GBL1033104	Chk1-M-C_GBL1033212	eIF4G-R-C_GBL1033135	Smad3-R-V_GBL1033085	Src_pY416-R-C_GBL1033066	GCN5L2-R-V_GBL1033262	EGFR-R-V_GBL1033132	IRS1-R-V_GBL1033086	GYS-R-V_GBL1033113	GYS_pS641-R-V_GBL1033114	mTOR-R-V_GBL1032831
Ctrl	0.928704	1.01951	1.83806	2.78546	0.681657	1.03333	0.913063	2.57226	0.830051	1.23998	0.819552	1.05817	0.359714	1.73372	0.63513	0.727725	0.671475	2.08688	0.779274	0.542907	1.6725	1.0035	0.284832	1.5081	1.3582	1.11077	0.660346	0.62272	1.35181	0.853011	1.79544	0.375145	2.52973	0.874657	0.52271	1.14425	0.319037	1.26313	1.66282	0.583487	1.12682	0.972381	0.549072	1.20678	0.849687	0.720703	1.66765	0.623212	1.48853
Ctrl	0.567702	1.1587	2.09711	2.14934	0.487325	1.12967	0.910193	2.49105	0.767151	1.3478	0.896031	1.11134	0.476152	1.61987	0.547329	0.785583	0.733044	2.12532	0.78384	0.526412	1.46046	1.33751	0.368574	1.33751	1.24259	0.946663	0.710632	0.613678	1.14405	0.813794	1.51307	0.408676	2.91119	0.891477	0.510549	1.01696	0.28985	0.964781	1.48223	0.464833	1.08842	0.966067	0.722872	1.2542	0.801631	0.717154	1.70458	0.652397	1.44877
Ctrl	0.725741	1.12251	2.59507	2.93887	0.540742	1.20495	1.07466	2.89553	0.735145	1.38066	0.807507	1.23546	0.521917	2.01992	0.579433	0.744195	0.685173	2.28327	0.810633	0.507805	1.51695	1.64156	0.470438	1.53654	1.41688	1.15889	0.709267	0.642726	1.54316	0.829674	1.94062	0.406152	3.57836	0.904628	0.484106	1.27082	0.306123	1.15889	1.82408	0.472046	1.16415	1.07207	0.823728	1.45951	0.741767	0.76136	2.16098	0.764548	1.53917
shRNA	0.41414	0.572814	1.2229	1.33624	0.400787	0.561194	0.821941	1.93173	0.556343	1.00911	0.640434	0.864962	0.351489	1.16263	0.481437	0.568607	0.520516	1.433	0.5663	0.455956	1.20141	1.09739	0.26515	1.08377	0.97317	0.816945	0.686302	0.488954	0.976485	0.736275	1.31121	0.3435	2.11263	0.730649	0.486561	0.884071	0.222147	0.839862	1.31513	0.490574	0.994894	0.831802	0.632792	1.06986	0.671831	0.61381	1.38938	0.538764	1.26599
shRNA	0.237455	0.6254	1.17694	1.59359	0.233055	0.804925	0.744831	1.76641	0.635232	0.938565	0.608037	0.82917	0.365717	1.59986	0.338483	0.630696	0.592607	2.00473	0.720538	0.362068	1.29704	1.21105	0.301564	1.24695	1.12178	0.8359	0.724419	0.490913	1.15308	0.592162	1.58559	0.303963	3.04387	0.715573	0.37563	1.10931	0.254682	0.970167	1.31871	0.388027	0.874961	0.869708	0.724694	1.23261	0.676762	0.642844	1.64301	0.645428	1.30123
shRNA	0.396977	0.615814	1.22945	1.46121	0.320435	0.630234	0.475434	1.91868	0.465823	0.910525	0.615466	0.849688	0.324779	1.36698	0.554509	0.563232	0.522659	1.69662	0.591949	0.442451	1.23148	0.888909	0.3362	1.22871	1.19479	0.982409	0.296445	0.568558	1.20643	0.742766	1.48975	0.34968	2.40233	0.796101	0.4119	0.894222	0.295934	1.0777	1.62605	0.424829	1.02895	0.885556	0.446124	1.07444	0.714413	0.641781	1.76072	0.586962	1.33008
Fold Change	2.11921	1.81955	1.79931	1.79312	1.79164	1.68705	1.41901	1.41696	1.40723	1.38844	1.35364	1.33853	1.30307	1.30126	1.28191	1.28083	1.27749	1.2651	1.26345	1.25121	1.24665	1.24559	1.24469	1.23114	1.22127	1.2205	1.21854	1.21357	1.21074	1.20533	1.19664	1.19338	1.19321	1.19107	1.19094	1.18854	1.18408	1.17283	1.16649	1.16643	1.16578	1.16368	1.16193	1.16097	1.16	1.15844	1.15441	1.15188	1.14861
P value	0.0300266	0.000377158	0.0122401	0.0100999	0.0290045	0.00651146	0.0734078	0.00437715	0.0162057	0.00200528	0.00171379	0.00584162	0.101819	0.0751999	0.132142	0.00396476	0.00739574	0.0612735	0.0275994	0.0271839	0.0115219	0.274727	0.269155	0.0274206	0.0429541	0.0795134	0.417671	0.0161792	0.156588	0.0483439	0.125977	0.0230466	0.302651	0.00549845	0.0789839	0.15517	0.107811	0.209051	0.172955	0.211985	0.0359885	0.0203181	0.443726	0.126827	0.0317609	0.00419924	0.269882	0.16581	0.00382937
	EGFR	KAT2A	CCNB1	ERBB2	CCNE1	FOXM1	MCL1	PMS2	NDRG1	MAPK1	ACACA	NFKB1	BAP1	YWHAZ	STAT3	EIF4EBP1	IRS1	RB1	ACACA ACACB	ATM	EIF4EBP1	RPS6KB1	CHEK1	PXN	EIF4E	AKT1S1	PTEN	PTK2	MYH9	MAPK1 MAPK3	KDR	CRM1	MSH6	PDCD4	CHEK1	STAT5A	MSH2	UBAC1	EIF4EBP1	ARAF	RBM15	EGFR	TSC1	MAPK14	PRKAA1	CHEK2	PEA15	RAF1	GSK3A GSK3B
WM3936	EGFR_pY1068-R-C_GBL1032818	GCN5L2-R-V_GBL1033262	Cyclin_B1-R-V_GBL1032816	HER2_pY1248-R-C_GBL1033122	Cyclin_E1-M-V_GBL1033181	FoxM1-R-V_GBL1033134	Mcl-1-R-V_GBL1033158	PMS2-R-V_GBL1033164	NDRG1_pT346-R-V_GBL1033246	p38-R-V_GBL1032836	ACC1-R-E_GBL1032798	NF-kB-p65_pS536-R-C_GBL1032834	BAP1-M-V_GBL1033214	14-3-3_zeta-R-V_GBL1033094	STAT3_pY705-R-V_GBL1033068	4E-BP1_pT37_T46-R-V_GBL1032796	IRS1-R-V_GBL1033086	Rb_pS807_S811-R-V_GBL1032847	ACC_pS79-R-V_GBL1032797	ATM-R-V_GBL1033172	4E-BP1_pS65-R-V_GBL1032795	p70S6K_pT389-R-V_GBL1032840	Chk1-M-C_GBL1033212	Paxillin-R-C_GBL1032841	eIF4E-R-V_GBL1033075	PRAS40_pT246-R-V_GBL1033078	PTEN-R-V_GBL1033063	FAK_pY397-R-V_GBL1033160	Myosin IIa pS1943-R-V_GBL1033149	MAPK_pT202_Y204-R-V_GBL1032829	VEGFR2-R-V_GBL1033072	CRM1-R-E_GBL1033238	MSH6-R-C_GBL1033119	PDCD4-R-C_GBL1033088	Chk1_pS345-R-C_GBL1033100	STAT5-alpha-R-V_GBL1033069	MSH2-M-V_GBL1033194	UBAC1-R-V_GBL1033169	4E-BP1-R-V_GBL1032794	A-Raf-R-V_GBL1033155	RBM15-R-V_GBL1033142	EGFR_pY1173-R-V_GBL1032819	TSC1-R-C_GBL1033136	p38_pT180_Y182-R-V_GBL1032837	AMPK_alpha-R-C_GBL1032799	Chk2-M-V_GBL1033180	PEA15-R-V_GBL1033110	C-Raf-R-V_GBL1033153	GSK3-alpha-beta_pS21_S9-R-V_GBL1032825
Ctrl	0.463036	1.20935	0.620149	0.25015	0.869949	0.400066	0.604943	0.919033	2.07518	1.3582	2.18939	0.660733	0.34686	1.54144	0.595417	2.52057	1.33865	1.15517	0.347724	0.0748266	1.98021	0.658043	0.601107	1.24307	0.840069	1.01785	0.345687	0.0607375	0.244564	1.15131	0.660153	1.70968	0.855558	1.66287	0.496121	1.29615	0.703907	0.243465	1.16615	0.54871	0.584765	0.84103	1.97881	0.535892	1.28414	0.63329	1.26168	1.59612	1.39685
Ctrl	0.827783	1.72646	0.442322	0.448299	0.883848	0.312835	0.591657	0.952068	1.76335	1.43478	2.09371	0.77341	0.335424	1.5343	0.607122	2.70427	1.30798	1.08607	0.377079	0.0681989	2.0917	0.669197	0.523136	1.21504	0.896266	1.00404	0.408112	0.0609531	0.303022	1.04877	0.733492	1.51099	0.762895	1.97324	0.501106	1.33238	0.635232	0.240937	1.20544	0.529582	0.521932	0.977025	1.83344	0.556094	1.24876	0.611519	1.26708	1.55835	1.45288
Ctrl	0.668457	1.64634	0.446612	0.360442	0.915789	0.294902	0.500708	0.949846	1.96171	1.50717	2.19183	0.762528	0.319649	1.63196	0.606923	2.6415	1.49264	1.11715	0.352003	0.0600893	2.00557	0.625177	0.520104	1.2825	0.854804	0.983694	0.407186	0.0618948	0.254717	1.15145	0.716184	1.60388	0.77135	1.91298	0.491097	1.35186	0.637288	0.215064	1.24202	0.574974	0.500441	0.93995	2.12977	0.550977	1.30261	0.623874	1.37938	1.65367	1.52191
shRNA	0.295447	0.694007	0.281877	0.216427	0.551078	0.215011	0.339835	0.588458	1.24226	0.977101	1.47088	0.547302	0.216547	1.13767	0.442691	1.9159	1.0488	0.828495	0.297413	0.0422311	1.58637	0.51284	0.45259	0.961264	0.679064	0.812242	0.308321	0.0501348	0.23132	0.873157	0.594318	1.24797	0.659346	1.5516	0.427847	1.11625	0.574818	0.195519	1.00847	0.483557	0.428408	0.786151	1.72606	0.467975	1.11612	0.549417	1.11679	1.37141	1.21331
shRNA	0.315256	0.697379	0.311299	0.199902	0.503111	0.182321	0.36028	0.610874	1.29969	1.0267	1.54757	0.534823	0.236229	1.16648	0.457106	2.01305	1.07064	0.890875	0.258496	0.0496981	1.59896	0.492877	0.409326	0.995108	0.668852	0.784712	0.319044	0.0499747	0.203286	0.925633	0.530824	1.39146	0.642016	1.55551	0.409298	1.12372	0.529451	0.206934	1.0344	0.469319	0.464614	0.798521	1.7188	0.477454	1.10292	0.51118	1.17149	1.42161	1.35998
shRNA	0.296981	0.776589	0.302306	0.213113	0.550388	0.224382	0.375381	0.620979	1.3186	0.997416	1.53632	0.497432	0.270118	1.12268	0.439685	1.93979	1.0413	0.859204	0.279774	0.0666372	1.562	0.522514	0.433575	0.994151	0.701497	0.792244	0.29619	0.0477664	0.215997	0.921532	0.592391	1.35293	0.683153	1.54281	0.41299	1.10847	0.565722	0.189786	1.0378	0.466536	0.488722	0.79179	1.67541	0.472031	1.09916	0.566858	1.12203	1.40624	1.25093
Fold Change	2.15855	2.11356	1.68522	1.68227	1.66373	1.62101	1.57816	1.54971	1.50244	1.43281	1.42157	1.39069	1.386	1.37378	1.35087	1.34038	1.30958	1.30242	1.28854	1.28094	1.28019	1.27757	1.26929	1.26778	1.26433	1.25799	1.25708	1.24148	1.23317	1.23204	1.22841	1.20844	1.20422	1.19337	1.19053	1.18873	1.1835	1.18105	1.173	1.16475	1.16312	1.16055	1.16049	1.15909	1.1559	1.14822	1.14598	1.145	1.14315
P value	0.029537	0.00782376	0.0259605	0.0676554	7.0239e-05	0.0210502	0.00379754	2.03196e-05	0.00233796	0.000672408	9.09036e-05	0.00612856	0.00605154	0.000230274	1.89482e-05	0.000408195	0.00485713	0.000641479	0.0051869	0.151231	0.000234831	0.000869531	0.0165887	0.000305095	0.000739884	9.02485e-05	0.0217775	0.000145848	0.0627965	0.00526499	0.0126414	0.0179638	0.0133065	0.0344529	0.000237208	0.000238562	0.0181715	0.0262197	0.00171786	0.00532966	0.0711213	0.0354813	0.034562	0.000350464	0.000486595	0.0102891	0.0169838	0.00296543	0.0327539
	PDGFR	CDH1	CCNE1	TFRC	RBM15	TP53	BAP1	CAV1	FN1	PAI1	FOXM1	ESR1	VHL	PYGM	CMC2	SYK	CTNNB1	ATR	COL6A1	ATP5H	CCNB1	RAD50	SHC1	CD29	CHEK1	CDH2	KIT	ACACA	MYC	IGFBP2	FOXO3	YBX1	MED30	G6PD	LCK	RAD51	PECAM1	SMAD1	EIF4G1	BIRC2	DIRAS3	YWHAE	SCD1	NDRG1	CLDN7	MSH2	EEF2K	BAK1	ATM
WM383B	PDGFR_beta-R-V_GBL1033159	E-Cadherin-R-V_GBL1033130	Cyclin_E1-M-V_GBL1033181	TFRC-R-V_GBL1033144	RBM15-R-V_GBL1033142	p53-R-C_GBL1032838	BAP1-M-V_GBL1033214	Caveolin-1-R-V_GBL1033240	Fibronectin-R-V_GBL1032823	PAl-1-M-V_GBL1033184	FoxM1-R-V_GBL1033134	ER-alpha-R-V_GBL1032821	VHL-M-QC_GBL1113748	GPBB-R-V_GBL1033165	Cox 2-R-C_GBL1033156	Syk-M-V_GBL1033201	beta-Catenin-R-V_GBL1032804	ATR-R-C_GBL1033099	Collagen_VI-R-V_GBL1032814	ATP5H-M-C_GBL1033216	Cyclin_B1-R-V_GBL1032816	Rad50-M-V_GBL1033200	Shc_pY317-R-V_GBL1033112	CD29-M-V_GBL1033213	Chk1-M-C_GBL1033212	N-Cadherin-R-V_GBL1032833	c-Kit-R-V_GBL1032813	ACC1-R-E_GBL1032798	c-Myc-R-C_GBL1033145	IGFBP2-R-V_GBL1032826	FOXO3a-R-C_GBL1033133	YB-1-R-V_GBL1033073	Complex_II_Subunit -M-V_GBL1033204	G6PD-M-V_GBL1033209	Lck-R-V_GBL1032828	Rad51-R-V_GBL1033247	CD31-M-V_GBL1033179	Smad1-R-V_GBL1033103	eIF4G-R-C_GBL1033135	cIAP-R-C_GBL1033104	ARHI-M-C_GBL1033223	14-3-3_beta-R-V_GBL1033093	SCD1-M-V_GBL1033205	NDRG1_pT346-R-V_GBL1033246	Claudin-7-R-V_GBL1033091	MSH2-M-V_GBL1033194	eEF2K-R-V_GBL1033118	Bak-R-C_GBL1032802	ATM_pS1981-R-V_GBL1033249
Ctrl	0.493709	1.53185	1.20145	1.15941	1.46869	1.55323	1.2113	1.01846	1.02832	1.25745	1.07742	1.14392	0.99829	0.976122	1.82292	1.19402	0.919786	1.22181	1.06609	1.10484	1.21136	1.10824	1.00291	0.978008	1.08231	1.07079	1.13348	1.05111	1.15765	0.754919	1.14426	0.975905	0.991882	0.890255	1.04538	1.083	1.09927	1.0294	0.990378	0.814947	1.07772	1.08543	1.03481	0.712135	0.986485	1.17112	1.06124	1.1078	1.05513
Ctrl	0.51067	1.01915	1.18262	1.28999	1.41504	1.57513	1.2215	1.02472	1.02338	1.26637	1.08024	1.10581	1.10581	1.02146	1.81437	1.18276	1.15019	1.19594	1.85259	1.11789	1.24409	1.11747	0.999859	0.968199	1.07118	1.10175	1.10844	1.01448	1.24229	0.746699	1.10597	0.986041	0.983947	0.893616	0.948431	1.12639	1.10581	1.00224	0.974308	0.780592	1.11633	1.11157	1.04066	0.685552	1.01941	1.15297	1.125	1.01658	1.04556
Ctrl	0.47831	1.28796	1.21197	1.22525	1.41656	1.50189	1.24773	1.07219	0.988239	1.27633	1.08632	1.19724	0.939214	1.01823	1.55299	1.06113	0.810195	1.20503	1.54089	1.14774	1.24443	1.08209	0.998863	1.01838	1.11684	1.07987	1.08707	1.04728	1.1462	0.737736	1.14975	0.959361	1.01694	0.921341	0.993836	1.10839	1.21823	1.01189	0.958129	0.8112	1.11279	1.12335	1.01238	0.675233	1.02231	1.10347	1.10641	1.10708	1.0632
shRNA	0.193274	0.665403	0.66818	0.829917	0.926237	1.01227	0.822138	0.824356	0.797812	1.08129	0.8283	0.839573	0.799117	0.780847	1.50107	0.999225	0.919556	0.947095	1.60196	0.910978	1.01637	0.907281	0.823498	0.825728	0.913921	0.999225	0.965285	0.865668	0.892119	0.695943	0.957237	0.84923	0.879571	0.772596	0.88728	0.976795	1.05571	0.934245	0.858237	0.707933	0.968712	0.999225	0.914669	0.619023	0.935434	1.03404	1.00297	0.991793	0.988639
shRNA	0.166199	0.554133	0.719572	0.75635	0.899351	0.991586	0.834806	0.68701	0.708984	0.692494	0.877489	1.01249	0.748769	0.917383	1.39083	0.9104	0.677453	1.0899	0.994337	1.00377	1.06848	0.978793	0.822196	0.867012	1.0079	0.894854	0.955931	0.950361	0.885093	0.637546	1.0827	0.872137	0.917359	0.873095	0.90295	1.01827	1.02598	0.92026	0.895211	0.739107	1.02855	1.03459	0.941569	0.65956	0.881601	1.07261	0.998608	1.02111	0.999266
shRNA	0.177534	0.465955	0.681519	0.76723	0.942106	1.04785	0.822244	0.708936	0.660583	1.04785	0.820117	0.873871	0.889802	0.782597	1.38014	0.934533	0.795305	0.975276	1.12759	0.934736	1.04785	0.914933	0.896614	0.820879	0.899056	0.914529	0.977735	0.896382	1.31972	0.623035	0.942807	0.865564	0.886698	0.781629	0.899207	0.995249	1.01075	0.897656	0.89539	0.734885	1.00767	0.989456	0.955509	0.610696	0.950926	1.04506	1.02721	0.960554	0.923665
Fold Change	2.76102	2.27765	1.73783	1.56136	1.55375	1.51726	1.48457	1.40313	1.40259	1.34679	1.28429	1.26451	1.24844	1.21565	1.21494	1.20877	1.20393	1.20267	1.19756	1.18284	1.18105	1.18093	1.18067	1.17941	1.15933	1.15801	1.14834	1.14764	1.14505	1.14456	1.13988	1.12926	1.1152	1.11448	1.11088	1.10951	1.10699	1.10587	1.10343	1.10303	1.10047	1.09826	1.0982	1.0972	1.09402	1.08752	1.08711	1.08677	1.08666
P value	1.3349e-05	0.0106815	8.5695e-06	0.000566075	1.89641e-05	4.22203e-05	4.25464e-06	0.0028788	0.00230632	0.0588342	0.000189245	0.0152953	0.0341774	0.0199041	0.0339588	0.016846	0.253943	0.0100947	0.450776	0.0047509	0.000539103	0.00251007	0.00340454	0.00209393	0.0151312	0.0113257	0.000639985	0.00815506	0.365637	0.0144939	0.0403202	0.000419367	0.0025154	0.0509174	0.024899	0.00328696	0.0539378	0.00186771	0.00411953	0.00685873	0.00933644	0.0050184	0.00337245	0.0305449	0.0222999	0.0167326	0.0136446	0.0697452	0.0253639
[truncated: 177 more columns]
